# Supplementary material for: A Switched Algorithm for Adaptive Feedback Cancellation Using Pre-Filters in Hearing Aids
Source: MDPI journal article supplement (doi:10.3390/audiolres11030037), 2021-08-09
Supplement: s1 [file s1]

This folder contains implementations of objective measures (Chapters 10 and 11):

| MATLAB file        | Description                                                                   | Reference              |
|--------------------|-------------------------------------------------------------------------------|------------------------|
| comp_snr.m         | Overall and segmental SNR                                                     | [1]                    |
| comp_wss.m         | Weighted-spectral slope metric                                                | [2]                    |
| comp_llr.m         | Likelihood-ratio measure                                                      | [3]                    |
| comp_is.m          | Itakura-Saito measure                                                         | [3]                    |
| comp_cep.m         | Cepstral distance measure                                                     | [4]                    |
| comp_fwseg         | Freq. weighted segm. SNR (fwSNRseg)                                           | [5], Chap 11, Eq. 11.5 |
| comp_fwseg_variant | Frequency-variant fwSNRseg measure                                            | Chapter 10, Eq. 10.24  |
| comp_fwseg_mars    | Frequency variant fwSNRseg measure based on MARS analysis                     | Chap 10, Sec. 10.5.4   |
| pesq.m             | PESQ measure                                                                  | [6]                    |
| composite.m        | A composite measure                                                           | [7]                    |
| addnoise_asl.m     | Adds noise to the clean signal at specified SNR based on active speech level. | [8]                    |

#### USAGE

```
>> [snr_mean, segsnr_mean]= compSNR(cleanFile.wav, enhdFile.wav);
    where 'snr_mean' is the global overall SNR and 'segsnr_mean' is the
    segmental SNR.

>> wss_mean = comp_wss(cleanFile.wav, enhancedFile.wav);

>> llr_mean= comp_llr(cleanFile.wav, enhancedFile.wav);

>> is_mean = comp_is(cleanFile.wav, enhancedFile.wav);

>> cep_mean = comp_cep(cleanFile.wav, enhancedFile.wav);

>> fwSNRseg = comp_fwseg(cleanFile.wav, enhancedFile.wav);

>> [SIG, BAK, OVL]=comp_fwseg_variant(cleanFile.wav, enhancedFile.wav);
    where 'SIG' is the predicted rating of speech distortion,
          'BAK' is the predicted rating of background noise distortion,
          'OVL' is the predicted rating of overall quality.

>> [SIG, BAK, OVL]=comp_fwseg_mars(cleanFile.wav, enhancedFile.wav);

>> pesq_mean = pesq(cleanFile.wav, enhancedFile.wav);
    Only sampling frequencies of 8000 Hz or 16000 Hz are supported.

>> [Csig, Cbak, Covl]=composite(cleanFile.wav, enhancedFile.wav);
    where 'Csig' is the predicted rating of speech distortion,
          'Cbak' is the predicted rating of background noise distortion,
          'Covl' is the predicted rating of overall quality.

>> addnoise_asl(cleanFile.wav, noisefile.wav, outfile.wav, SNRlevel)
```

REFERENCES:

- [1] Hansen, J. and Pellom, B. (1998). An effective quality evaluation protocol for speech enhancement algorithms. Inter. Conf. on Spoken Language Processing, 7(2819), 2822
- [2] Klatt, D. (1982). Prediction of perceived phonetic distance from critical band spectra. Proc. IEEE Int. Conf. Acoust. , Speech, Signal Processing, 7, 1278-1281.
- [3] Quackenbush, S., Barnwell, T., and Clements, M. (1988). Objective measures of speech quality. NJ: Prentice-Hall, Eaglewood Cliffs.
- [4] Kitawaki, N., Nagabuchi, H., and Itoh, K. (1988). Objective quality evaluation for low bit-rate speech coding systems. IEEE J. Select. Areas in Comm., 6(2), 262-273.
- [5] Tribolet, J., Noll, P., McDermott, B., and Crochiere, R. E. (1978). A study of complexity and quality of speech waveform coders. Proc. IEEE Int. Conf. Acoust. , Speech, Signal Processing, 586-590.
- [6] ITU (2000). Perceptual evaluation of speech quality (PESQ), and objective method for end-to-end speech quality assessment of narrowband telephone networks and speech codecs. ITU-T Recommendation P. 862
- [7] Hu, Y. and Loizou, P. (2006). Evaluation of objective measures for speech enhancement. Proc. Interspeech
- [8] ITU-T (1993). Objective measurement of active speech level. ITU-T Recommendation P. 56

Copyright (c) 2006 by Philippos C. Loizou  
\$Revision: 0.0 \$ \$Date: 07/30/2006 \$

---
